# Supplementary material
Source: Elsevier journal article supplement (https://univ-rennes.hal.science/hal-01544467v1/file/mmc2.zip)
Supplement: mmc2 [file mmc2.zip › mmc2/NH4VPox.mol]

shelx
  --CCDC--051517    3D                              

 39 37  0  0  0  0  0  0  0  0999 V2000
    0.0382    4.1813    2.7942 V      0
    3.2196    3.9872    3.3226 P      0
    0.1025    3.2681    4.0937 O      0
    0.0742    5.1688    0.7232 O      0
    2.0107    4.5298    2.5767 O      0
    3.3819    4.5697    4.7307 O      0
    0.3091    4.5985   -1.4373 O      0
    4.4473    4.1599    2.4445 O      0
    0.2156    4.3452   -0.1970 C      0
    3.1150    2.6828    3.5133 H      0
    0.4491    2.0400   -0.7232 O      0
    0.3077    2.8636    0.1970 C      0
    0.2142    2.6103    1.4373 O      0
    0.4852    3.0276   -2.7942 V      0
   -2.6963    3.2216   -3.3226 P      0
    0.4208    3.9407   -4.0937 O      0
   -1.4874    2.6791   -2.5767 O      0
   -2.8586    2.6392   -4.7307 O      0
   -3.9239    3.0489   -2.4445 O      0
   -2.5917    4.5260   -3.5133 H      0
   -2.6912    0.7764   -5.4144 V      0
    6.4226    4.1813    2.7942 V      0
   -5.8992    3.0276   -2.7942 V      0
    3.2145    6.4325    5.4144 V      0
    0.6526    1.1648   -3.4780 O      0
   -0.1293    6.0440    3.4780 O      0
   -1.9371    4.1599    2.4445 O      0
    2.4605    3.0489   -2.4445 O      0
    4.6212    2.8734    6.6581 O      0
    4.2706    3.4822    6.0662 H      0
    4.1458    2.1250    6.4438 H      0
    2.2223    7.2064    1.3290 N      0
    3.0611    7.4589    1.5761 H      0
    2.1234    6.3960    1.7074 H      0
    2.1888    7.0903    0.4269 H      0
    1.7157    7.9176    1.5350 H      0
    3.5183    4.5217   -0.2077 O      0
    2.9952    5.0234   -0.6772 H      0
    4.1415    5.0515    0.0772 H      0
  1  3  1
  1  4  1
  1  5  1
  1 13  1
  1 26  1
  1 27  1
  2  5  1
  2  6  1
  2  8  1
  2 10  1
  4  9  1
  6 24  1
  7  9  1
  7 14  1
  8 22  1
  9 12  1
 11 12  1
 11 14  1
 12 13  1
 14 16  1
 14 17  1
 14 25  1
 14 28  1
 15 17  1
 15 18  1
 15 19  1
 15 20  1
 18 21  1
 19 23  1
 29 30  1
 29 31  1
 32 33  1
 32 34  1
 32 35  1
 32 36  1
 37 38  1
 37 39  1
M  END
$$$$
